# Supplementary material
Source: PubMed Central journal article supplement (PMC3965331)
Supplement: NIHMS458130-supplement-Supplementary_Figure_1.pdf [file NIHMS458130-supplement-Supplementary_Figure_1.pdf]

**Supplementary Online Material**

Brian J. Prendergast, Yasmine M. Cisse, Erin J. Cable and Irving Zucker

**“Dissociation of ultradian and circadian phenotypes in female and male  
Siberian hamsters”**

*Journal of Biological Rhythms*

Supplementary Online Figure 1

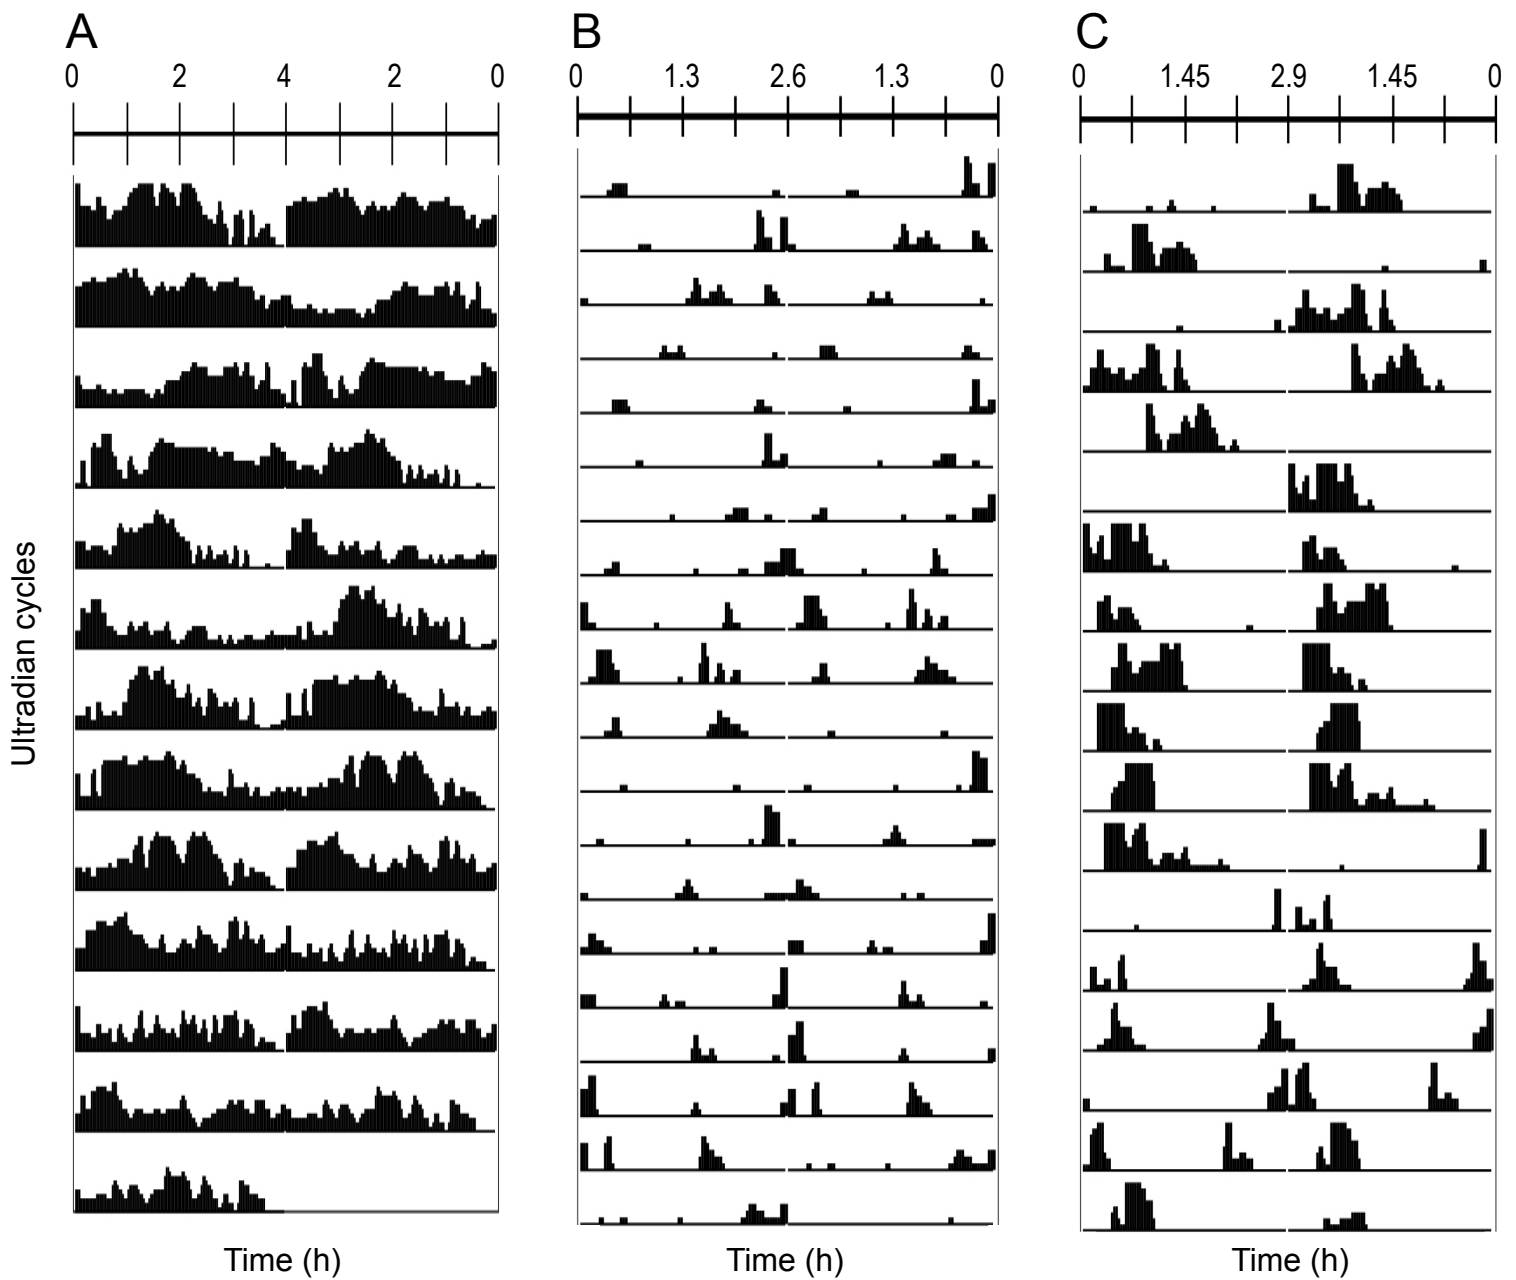

Hamster: 104-1  
 Phenotype: ENTR  
 Scale: 0-40  
 $\tau' = 4.0$  h  
 Robustness = 9.6%

Hamster: 70-1  
 Phenotype: ARR  
 Scale: 0-5  
 $\tau' = 2.6$  h  
 Robustness = 3.4%

Hamster: 13-1  
 Phenotype: ARR  
 Scale: 0-10  
 $\tau' = 2.8$  h  
 Robustness = 7.3%

*Supplementary Online Material, Figure 1.*

**Ultradian locomotor activity of female Siberian hamsters.**

(A-C) Representative double-plotted activity records of three female Siberian hamsters. Activity data from ten successive dark phases were concatenated into a single record (see Materials and Methods for details). Data are plotted with abscissae equal to the individual hamster's UR tau ( $\tau'$ ); successive ultradian cycles are plotted from top to bottom.
